# Supplementary material for: Comprehensive Genetic Analysis of a Hungarian Amyotrophic Lateral Sclerosis Cohort
Source: PubMed Central journal article supplement (PMC6707335; doi:10.3389/fgene.2019.00732), 2019-08-16
Supplement: DataSheet_1.pdf [file DataSheet_1.pdf]

| Gene set 1 (n=30) | Gene set 2 (n=101)              | Gene set 3 (n=116)  | Disease names linked to Gene set 3 - based on OMIM terminology                                                                                                                                                                                                                                     |
|-------------------|---------------------------------|---------------------|----------------------------------------------------------------------------------------------------------------------------------------------------------------------------------------------------------------------------------------------------------------------------------------------------|
| Major ALS genes   | Minor (risk or candidate) genes | Other disease genes |                                                                                                                                                                                                                                                                                                    |
| ALS2              | C21orf2                         | AARS                | Charcot-Marie-Tooth disease, axonal, type 2N<br>Myopathy, scapulohumeroparsonal, Myopathy, actin, congenital, with cores, Myopathy, actin, congenital, with excess of thin myofibrils, Myopathy, congenital, with fiber-type disproportion 1, Nemaline myopathy 3, autosomal dominant or recessive |
| ATXN2             | EPB41L1                         | ACTA1               | Spastic paraplegia 9A, autosomal dominant, Spastic paraplegia 9B, autosomal recessive                                                                                                                                                                                                              |
| C9orf72           | EPHA4                           | AFG3L2              | Spastic paraplegia 9A, autosomal dominant, Spastic paraplegia 9B, autosomal recessive                                                                                                                                                                                                              |
| CENF              | HNRNPA2B1                       | ALDH18A1            | Spastic paraplegia 9A, autosomal dominant, Spastic paraplegia 9B, autosomal recessive                                                                                                                                                                                                              |
| CHCHD10           | LMNB1                           | ANOS                | Spastic paraplegia 50, autosomal recessive                                                                                                                                                                                                                                                         |
| CHMP2B            | MAPT                            | AP4M1               | Ataxia-oculomotor apraxia syndrome                                                                                                                                                                                                                                                                 |
| DAO               | MOBP                            | APTX                | Spastic paraplegia 3A, autosomal dominant                                                                                                                                                                                                                                                          |
| DCTN1             | ON1                             | ATG5                | Neuropathy, hereditary sensory, type IIB, Spastic paraplegia 3A, autosomal dominant                                                                                                                                                                                                                |
| KIF5A             | PON2                            | ATL1                | Myopathy, myofibrillar, 6                                                                                                                                                                                                                                                                          |
| FUS               | PON3                            | ATM                 | Spinal muscular atrophy, lower extremity-predominant, 2, AD                                                                                                                                                                                                                                        |
| GLE1              | PRPH                            | BAG3                | Spastic paraplegia type 17, Distal hereditary motor neuropathy type 5A                                                                                                                                                                                                                             |
| GRN               | PSEN1                           | BICD2               |                                                                                                                                                                                                                                                                                                    |
| HNRNPA1           | SARM1                           | BSCL2               |                                                                                                                                                                                                                                                                                                    |
| MATR3             | SCFD1                           | C10orf2             | Progressive external ophthalmoplegia with mitochondrial DNA deletions, autosomal dominant 3                                                                                                                                                                                                        |
| NEFH              | SPG7                            | CAB                 | Cerebellar ataxia and mental retardation with or without quadrupedal locomotion 3                                                                                                                                                                                                                  |
| NEK1              | TREM2                           | CAONA1A             | Spastic paraplegia 6                                                                                                                                                                                                                                                                               |
| OPTN              | UNC13A                          | CCDC88C             | Myopathy, myofibrillar, 2                                                                                                                                                                                                                                                                          |
| PFN1              | VEGFA                           | CLN5                | Ceroid lipofuscinosis, neuronal 5                                                                                                                                                                                                                                                                  |
| SIGMAR1           | AGT                             | CNBP                | Myotonic dystrophy 2                                                                                                                                                                                                                                                                               |
| SOD1              | ALAD                            | COX20               | Mitochondrial complex IV deficiency                                                                                                                                                                                                                                                                |
| SPG11             | APPE1                           | CPT1C               | Spastic paraplegia 73, autosomal dominant                                                                                                                                                                                                                                                          |
| SOSTM1            | APOE                            | CRYAB               | Myopathy, myofibrillar, 2                                                                                                                                                                                                                                                                          |
| SS18L1            | AR                              | DES                 | Muscular dystrophy, limb-girdle, type 2R, Myopathy, myofibrillar, 1                                                                                                                                                                                                                                |
| TAF15             | ARHGFEF28                       | DHTKD1              | Charcot-Marie-Tooth disease, axonal, type 2Q                                                                                                                                                                                                                                                       |
| TARDBP            | B4GALT6                         | DMPK                | Myotonic dystrophy 1                                                                                                                                                                                                                                                                               |
| TBK1              | BCL11B                          | DNM2                | Charcot-Marie-Tooth disease, axonal, type 2M                                                                                                                                                                                                                                                       |
| TUBA4A            | BCL6                            | DRP2                | Charcot-Marie-Tooth neuropathy, X-linked dominant, 1 candidate gene                                                                                                                                                                                                                                |
| UBQLN2            | C1orf27                         | EEF2                | Spastic paraplegia 26                                                                                                                                                                                                                                                                              |
| VAPB              | CCS                             | EGR2                | Charcot-Marie-Tooth disease, type 1D                                                                                                                                                                                                                                                               |
| VCP               | CDH13                           | ELI OVL4            | Spastic paraplegia 34                                                                                                                                                                                                                                                                              |
|                   | CDH2                            | ELOVL5              | Spastic paraplegia 38                                                                                                                                                                                                                                                                              |
|                   | CHGB                            | ERLIN1              | Spastic paraplegia 62                                                                                                                                                                                                                                                                              |
|                   | CNTF                            | FBLN5               | Neuropathy, hereditary, with or without age-related macular degeneration                                                                                                                                                                                                                           |
|                   | CNTN4                           | FGD4                | Charcot-Marie-Tooth disease, type 4H                                                                                                                                                                                                                                                               |
|                   | CNTN6                           | FGF14               | Spastic paraplegia 27                                                                                                                                                                                                                                                                              |
|                   | CRM1                            | FLNC                | Myofibrillar, distal myopathy                                                                                                                                                                                                                                                                      |
|                   | CRYM                            | GDAP1               | Charcot-Marie-Tooth disease, axonal, type 2K, Charcot-Marie-Tooth disease, type 4A                                                                                                                                                                                                                 |
|                   | CSNK1G3                         | GJB1                | Charcot-Marie-Tooth disease type X1                                                                                                                                                                                                                                                                |
|                   | CST3                            | GNB4                | Charcot-Marie-Tooth disease, dominant intermediate F                                                                                                                                                                                                                                               |
|                   | CKXOR1                          | GNE                 | Nemaline myopathy                                                                                                                                                                                                                                                                                  |
|                   | CKP2D6                          | GRIN2               | Spastic paraplegia 13, autosomal dominant                                                                                                                                                                                                                                                          |
|                   | DIAPH3                          | HADHB               | Spastic paraplegia 18                                                                                                                                                                                                                                                                              |
|                   | DISC1                           | HSPB8               | Trifunctional protein deficiency                                                                                                                                                                                                                                                                   |
|                   | DOC2B                           | HSPB9               | Charcot-Marie-Tooth disease, axonal, type 2F/ Neuropathy, distal hereditary motor, type IIB                                                                                                                                                                                                        |
|                   | DPP6                            | HSPD1               | Charcot-Marie-Tooth disease, axonal, type 2L/ Neuropathy, distal hereditary motor, type IIA                                                                                                                                                                                                        |
|                   | DYNC1H1                         | IGHMBP2             | Spastic paraplegia 13, autosomal dominant                                                                                                                                                                                                                                                          |
|                   | EFEMP1                          | INF2                | Charcot-Marie-Tooth disease type 2S                                                                                                                                                                                                                                                                |
|                   | FEZF2                           | ITPR1               | Charcot-Marie-Tooth disease type dominant intermediate E                                                                                                                                                                                                                                           |
|                   | FGGY                            | KB1BD13             | Spastic paraplegia 15/Spastic paraplegia 29, congenital nonprogressive                                                                                                                                                                                                                             |
|                   | GARS                            | KCNA2               | Nemaline myopathy 5, autosomal dominant                                                                                                                                                                                                                                                            |
|                   | GRB14                           | KCND3               | Early infantile epileptic encephalopathy                                                                                                                                                                                                                                                           |
|                   | HEXA                            | KIAA0196            | Spastic paraplegia 19                                                                                                                                                                                                                                                                              |
|                   | HFE                             | KIF1B               | Spastic paraplegia 8, autosomal dominant                                                                                                                                                                                                                                                           |
|                   | ITPR2                           | LID3                | Charcot-Marie-Tooth disease type 2A1                                                                                                                                                                                                                                                               |
|                   | KDR                             | LITAF               | Myopathy, myofibrillar, 4                                                                                                                                                                                                                                                                          |
|                   | KIFAP3                          | LMNA                | Charcot-Marie-Tooth disease, type 1C                                                                                                                                                                                                                                                               |
|                   | LIF                             | MARS                | Limb-girdle muscular dystrophy type 1B                                                                                                                                                                                                                                                             |
|                   | LIPC                            | MED25               | Charcot-Marie-Tooth disease, axonal, type 2U                                                                                                                                                                                                                                                       |
|                   | LOX                             | MFN2                | Charcot-Marie-Tooth disease type 2B2                                                                                                                                                                                                                                                               |
|                   | LUM                             | MORC2               | Charcot-Marie-Tooth disease, axonal, type 2A2A/ Hereditary motor and sensory neuropathy VIA                                                                                                                                                                                                        |
|                   | MAOB                            | MPZ                 | Charcot-Marie-Tooth disease, axonal, type 2Z                                                                                                                                                                                                                                                       |
|                   | MT-ND2                          | MRE11A              | Charcot-Marie-Tooth disease, dominant intermediate D / Charcot-Marie-Tooth disease, type 1B/ Charcot-Marie-Tooth disease, type 2I/ Neuropathy, congenital hypomyelinating                                                                                                                          |
|                   | NAIP                            | MTMR2               | Ataxia-telangiectasia-like disorder 1                                                                                                                                                                                                                                                              |
|                   | NETO1                           | MYH7                | Charcot-Marie-Tooth disease, type 4B1                                                                                                                                                                                                                                                              |
|                   | NIPA1                           | MYOT                | Laing distal myopathy/ Myopathy, myosin storage, autosomal dominant                                                                                                                                                                                                                                |
|                   | NT5C1A                          | NDRG1               | Muscular dystrophy, limb-girdle, type 1A                                                                                                                                                                                                                                                           |
|                   | OGG1                            | NEFL                | Charcot-Marie-Tooth disease, dominant intermediate G/ Charcot-Marie-Tooth disease, type 1F, 2E                                                                                                                                                                                                     |
|                   | OMA1                            | NKX2-1              | Chorea, hereditary benign                                                                                                                                                                                                                                                                          |
|                   | PARK7                           | NPC1                | Niemann-Pick disease, type C1, D                                                                                                                                                                                                                                                                   |
|                   | PCP4                            | NPC2                | Niemann-pick disease, type C2                                                                                                                                                                                                                                                                      |
|                   | PLEKHG5                         | PCNA                | Ataxia-telangiectasia-like disorder 2                                                                                                                                                                                                                                                              |
|                   | PVR                             | PDYN                | Spastic paraplegia 23                                                                                                                                                                                                                                                                              |
|                   | RAMP3                           | PEX10               | Peroxisome biogenesis disorder 6A, 6B                                                                                                                                                                                                                                                              |
|                   | RBMS1                           | PK3R5               | Ataxia-oculomotor apraxia 3                                                                                                                                                                                                                                                                        |
|                   | RNASE2                          | PLP1                | Spastic paraplegia 2, X-linked                                                                                                                                                                                                                                                                     |
|                   | RNF19A                          | PMP22               | Neuropathy, inflammatory demyelinating, Charcot-Marie-Tooth disease, type 1A, 1E                                                                                                                                                                                                                   |
|                   | SCN7A                           | PNKP                | Ataxia-oculomotor apraxia 4                                                                                                                                                                                                                                                                        |
|                   | SELL                            | PNPLA2              | Neutral lipid storage disease with myopathy                                                                                                                                                                                                                                                        |
|                   | SEMA6A                          | POLG                | Progressive external ophthalmoplegia type A1, Sensory ataxic neuropathy dysarthria and ophthalmoparesis                                                                                                                                                                                            |
|                   | SLC1A2                          | PRKCG               | Spastic paraplegia 14                                                                                                                                                                                                                                                                              |
|                   | SLC39A11                        | PRPS1               | Charcot-Marie-Tooth disease, X-linked recessive, 5                                                                                                                                                                                                                                                 |
|                   | SMN1                            | PRX                 | Charcot-Marie-Tooth disease type 4F                                                                                                                                                                                                                                                                |
|                   | SMN2                            | RAB7A               | Charcot-Marie-Tooth disease type 2B                                                                                                                                                                                                                                                                |
|                   | SNGG                            | REEP1               | Neuronopathy, distal hereditary motor, type VB, Spastic paraplegia 31                                                                                                                                                                                                                              |
|                   | SOD2                            | REEP2               | Spastic paraplegia 72                                                                                                                                                                                                                                                                              |
|                   | SOX5                            | RTN2                | Spastic paraplegia 12                                                                                                                                                                                                                                                                              |
|                   | SUSD1                           | SACS                | Spastic ataxia type Charlevoix-Saguenay                                                                                                                                                                                                                                                            |
|                   | SYNE1                           | SBF1                | Charcot-Marie-Tooth disease type 4B3                                                                                                                                                                                                                                                               |
|                   | SYT9                            | SBF2                | Charcot-Marie-Tooth disease, type 4B2                                                                                                                                                                                                                                                              |
|                   | TRPM7                           | SEPT9               | Amyotrophy, hereditary neuralgic                                                                                                                                                                                                                                                                   |
|                   | VDR                             | SH3TC2              | Mononeuropathy of the median nerve, Charcot-Marie-Tooth disease type 4C                                                                                                                                                                                                                            |
|                   | VPS54                           | SIL1                | Marinusco-Sjogren syndrome                                                                                                                                                                                                                                                                         |
|                   | ZFP64                           | SLC33A1             | Spastic paraplegia 42                                                                                                                                                                                                                                                                              |
|                   | ZNF512B                         | SOX10               | PCWH syndrome                                                                                                                                                                                                                                                                                      |
|                   | ZNF746                          | SPAST               | Spastic paraplegia 4, autosomal dominant                                                                                                                                                                                                                                                           |
|                   | EWSR1                           | SPTBN2              | Spastic paraplegia 5                                                                                                                                                                                                                                                                               |
|                   | ANO3                            | STUB1               | Spastic paraplegia type 16                                                                                                                                                                                                                                                                         |
|                   | ELP3                            | TFG                 | Hereditary motor and sensory neuropathy, Okinawa type/ ?Spastic paraplegia 57, autosomal recessive                                                                                                                                                                                                 |
|                   | ERBB4                           | TGM6                | Spastic paraplegia 35                                                                                                                                                                                                                                                                              |
|                   | FIG4                            | TIA1                | Welander distal myopathy                                                                                                                                                                                                                                                                           |
|                   | SETX                            | TMEM240             | Spastic paraplegia 21                                                                                                                                                                                                                                                                              |
|                   |                                 | TPM2                | Nemaline or cap myopathy                                                                                                                                                                                                                                                                           |
|                   |                                 | TPM3                | CAP myopathy 1/ Myopathy, congenital, with fiber-type disproportion/ Nemaline myopathy 1                                                                                                                                                                                                           |
|                   |                                 | TPP1                | Spastic paraplegia 1/ Myopathy, congenital, with fiber-type disproportion/ Nemaline myopathy 1                                                                                                                                                                                                     |
|                   |                                 | TRIM2               | Charcot-Marie-Tooth disease, type 2R                                                                                                                                                                                                                                                               |
|                   |                                 | TRPC3               | Spastic paraplegia 41                                                                                                                                                                                                                                                                              |
|                   |                                 | TRPV4               | Hereditary motor and sensory neuropathy, type IIC/ Scapuloperoneal spinal muscular atrophy/ Spinal muscular atrophy, distal, congenital nonprogressive                                                                                                                                             |
|                   |                                 | TSEN54              | Pontocerebellar hypoplasia type 5, 2A, 4                                                                                                                                                                                                                                                           |
|                   |                                 | TBK2                | Spastic paraplegia 11                                                                                                                                                                                                                                                                              |
|                   |                                 | TPA                 | Ataxia with isolated vitamin E deficiency                                                                                                                                                                                                                                                          |
|                   |                                 | YARS                | Charcot-Marie-Tooth disease, dominant intermediate C                                                                                                                                                                                                                                               |
|                   |                                 | ZFYVE26             | Spastic paraplegia type 15                                                                                                                                                                                                                                                                         |
|                   |                                 | GBE1                | Polyglucosan body neuropathy, adult form (APBN)                                                                                                                                                                                                                                                    |
|                   |                                 | LRSM1               | Charcot-Marie-Tooth disease type 2P                                                                                                                                                                                                                                                                |
|                   |                                 | WASHC5              | Spastic paraplegia 8, autosomal dominant                                                                                                                                                                                                                                                           |

Supplementary Table 1. Gene lists used in this study

Supplementary Table 2. Variants detected in minor ALS genes in this study

| Patient ID | Gene    | Transcript ID | Nucleotide change | Amino acid change | Variant description | PopMax MAF (ExAc)     | ALSdb MAF ALS         | ALSdb MAF Control     | dbSNP        | Pathogenicity (ACMG) |
|------------|---------|---------------|-------------------|-------------------|---------------------|-----------------------|-----------------------|-----------------------|--------------|----------------------|
| #48r       | CCS     | NM_005125     | c.490-1G>A        | -                 | splicing            | 0                     | 0                     | 0                     | rs1199737977 | VUS                  |
| #2u        | CDH13   | NM_001220488  | c.A713G           | p.N238S           | nonsyn SNV          | 0                     | 3.09X10 <sup>-4</sup> | 0.00008469            | rs757294994  | VUS                  |
| #59r       | CDH22   | NM_021248     | c.G352A           | p.D118N           | nonsyn SNV          | 1.65X10 <sup>-5</sup> | 0                     | 0                     | rs372007812  | VUS                  |
| #84u       | CNTN6   | NM_014461     | c.G2222C          | p.R741P           | nonsyn SNV          | 0                     | 0                     | 0                     | rs754797179  | VUS                  |
| #56r       | DIAPH3  | NM_001042517  | c.G1445A          | p.R482Q           | nonsyn SNV          | 0                     | 0                     | 0                     | rs762394580  | VUS                  |
| #80r       | DIAPH3  | NM_001042517  | c.C3554G          | p.A1185G          | nonsyn SNV          | 0                     | 0                     | 0                     | -            | VUS                  |
| #64r       | DISC1   | NM_001012958  | c.C1055G          | p.P352R           | nonsyn SNV          | 0                     | 0                     | 0                     | rs750722558  | VUS                  |
| #113u      | DISC1   | NM_001164550  | c.T1163C          | p.L388P           | nonsyn SNV          | 0                     | 0                     | 0                     | rs1196077554 | VUS                  |
| #80u       | DPP6    | NM_130797     | c.A1424G          | p.D475G           | nonsyn SNV          | 0                     | 0                     | 0                     | -            | VUS                  |
| #54r       | DYNC1H1 | NM_001376     | c.C7748T          | p.T2583I          | nonsyn SNV          | 0                     | 0                     | 0                     | -            | VUS                  |
| #54r       | DYNC1H1 | NM_001376     | c.G12868C         | p.G4290R          | nonsyn SNV          | 0                     | 0                     | 0                     | -            | VUS                  |
| #87u       | DYNC1H1 | NM_001376     | c.C11221T         | p.R3741C          | nonsyn SNV          | 0                     | 0                     | 0                     | -            | VUS                  |
| #50u       | EPBA1L1 | NM_012156     | c.C1123T          | p.R375W           | nonsyn SNV          | 0                     | 0                     | 0                     | rs758635781  | VUS                  |
| #69u       | EPHA4   | NM_004438     | c.C281T           | p.A94V            | nonsyn SNV          | 0                     | 0                     | 0                     | rs1347356714 | VUS                  |
| #71u       | ERBB4   | NM_005235     | c.G268T           | p.A90S            | nonsyn SNV          | 5.14X10 <sup>-5</sup> | 0                     | 8.47X10 <sup>-5</sup> | rs201678258  | VUS                  |
| #97u       | FEZF2   | NM_018008     | c.G675T           | p.K225N           | nonsyn SNV          | 0                     | 0                     | 0                     | -            | VUS                  |
| #94u       | FIG4    | NM_014845     | c.C2095T          | p.R699C           | nonsyn SNV          | 0                     | 0                     | 8.47X10 <sup>-5</sup> | rs764799053  | VUS                  |
| #55u       | GRB14   | NM_004490     | c.C1007T          | p.A336V           | nonsyn SNV          | 0                     | 0                     | 0                     | rs756507556  | VUS                  |
| #114u      | GRB14   | NM_004490     | c.C386T           | p.T129M           | nonsyn SNV          | 5.78X10 <sup>-5</sup> | 0                     | 4.23X10 <sup>-5</sup> | rs141568578  | VUS                  |
| #82r       | HEXA    | NM_000520     | c.1073+1G>C       | -                 | splicing            | 2.25X10 <sup>-4</sup> | 4.64X10 <sup>-4</sup> | 6.80X10 <sup>-4</sup> | rs76173977   | Likely pathogenic    |
| #88u       | KDR     | NM_002253     | c.C1595T          | p.A532V           | nonsyn SNV          | 9.89X10 <sup>-5</sup> | 0                     | 1.27X10 <sup>-4</sup> | rs147066083  | VUS                  |
| #100u      | KIFAP3  | NM_014970     | c.A1043G          | p.K348R           | nonsyn SNV          | 0                     | 0                     | 0                     | rs1203689157 | VUS                  |
| #79u       | OMA1    | NM_145243     | c.T623G           | p.V208G           | nonsyn SNV          | 2.47X10 <sup>-5</sup> | 0                     | 0                     | rs552327271  | VUS                  |
| #80u       | PLEKHG5 | NM_001265593  | c.A1244C          | p.H415P           | nonsyn SNV          | 0                     | 0                     | 0                     | -            | VUS                  |
| #111u      | PLEKHG5 | NM_001265593  | c.C980T           | p.P327L           | nonsyn SNV          | 0                     | 0                     | 0                     | rs910474236  | VUS                  |
| #84u       | PON2    | NM_000305     | c.T705G           | p.Y235X           | nonsyn SNV          | 0                     | 0                     | 0                     | -            | VUS                  |
| #75u       | PON3    | NM_000940     | c.A916T           | p.I306F           | nonsyn SNV          | 5.77X10 <sup>-5</sup> | 1.56X10 <sup>-4</sup> | 1.69X10 <sup>-4</sup> | rs201661676  | VUS                  |
| #57r       | SCFD1   | NM_016106     | c.C608T           | p.T203I           | nonsyn SNV          | 0                     | 0                     | 0                     | rs1459319965 | VUS                  |
| #57r       | SCN7A   | NM_002976     | c.A1585G          | p.M529V           | nonsyn SNV          | 0                     | 0                     | 0                     | rs1462705963 | VUS                  |
| #81r       | SPG7    | NM_003119     | c.C1235T          | p.A412V           | nonsyn SNV          | 0                     | 0                     | 0                     | rs746668495  | VUS                  |
| #122u      | SPG7    | NM_003119     | c.G1813C          | p.G605R           | nonsyn SNV          | 0                     | 0                     | 0                     | -            | VUS                  |
| #81u       | SUSD1   | NM_022486     | c.C1135T          | p.R379C           | nonsyn SNV          | 0                     | 0                     | 8.47X10 <sup>-5</sup> | rs778163116  | VUS                  |
| #91u       | VPS54   | NM_016516     | c.A1078G          | p.T360A           | nonsyn SNV          | 2.62X10 <sup>-5</sup> | 1.56X10 <sup>-4</sup> | 8.47X10 <sup>-5</sup> | rs200574098  | VUS                  |

PopMax MAF (ExAc): Maximal general minor allele frequency of the variant in the ExAc database; ACMG: guideline of the American College of Medical Genetics and Genomics; dbSNP: Single Nucleotide Polymorphism Database reference SNP ID number for the variant; ALSdb MAF ALS: Minor allele frequency in ALS Data Browser (ALSdb) variants from 3,239 ALS cases; ALSdb MAF Control: Minor allele frequency in ALS Data Browser (ALSdb) containing variants from 11,808 controls; VUS: variant of uncertain significance;

Supplementary Table 3. Variants detected in other disease genes identified in ALS cases in this study

| Patient ID | Gene     | Transcript ID | Nucleotide change | Amino acid change | PopMax MAF (ExAc)     | ALSdb MAF ALS         | ALSdb MAF Control     | dbSNP        | Pathogenicity (ACMG) |
|------------|----------|---------------|-------------------|-------------------|-----------------------|-----------------------|-----------------------|--------------|----------------------|
| #2u        | AFG3L2   | NM_006796     | c.G499A           | p.G167R           | 0                     | 0                     | 0                     | rs1234429070 | VUS                  |
| #63u       | ALDH18A1 | NM_002860     | c.G2308A          | p.V770M           | 2,47X10 <sup>-5</sup> | 0                     | 0                     | rs369153920  | VUS                  |
| #87u       | ATM      | NM_000051     | c.A2755G          | p.R919G           | 0                     | 0                     | 0                     | -            | VUS                  |
| #102u      | ATM      | NM_000051     | c.T8717C          | p.V2906A          | 0                     | 0                     | 0                     | rs730881328  | VUS                  |
| #60r       | BSC1     | NM_001122955  | c.A641G           | p.H214R           | 3,01X10 <sup>-5</sup> | 0                     | 0                     | rs544020840  | VUS                  |
| #64u       | CACNA1A  | NM_001127221  | c.G6517T          | p.D2173Y          | 0                     | 0                     | 0                     | rs370289732  | VUS                  |
| #120u      | CACNA1A  | NM_001127221  | c.G3259T          | p.G1087C          | 0                     | 0                     | 0                     | -            | VUS                  |
| #42r       | FLNC     | NM_001127487  | c.C3428T          | p.S1143L          | 0                     | 0                     | 0                     | rs756192123  | VUS                  |
| #45r       | GBE1     | NM_000158     | c.A1193G          | p.H398R           | 0                     | 0                     | 0                     | rs755004170  | VUS                  |
| #71r       | GBE1     | NM_000158     | c.C496T           | p.R166C           | 1,22X10 <sup>-4</sup> | 0                     | 8,47X10 <sup>-5</sup> | rs376546162  | VUS                  |
| #42r       | GJB1     | NM_000166     | c.C688T           | p.R230C           | 0                     | 2,22X10 <sup>-4</sup> | 1,73X10 <sup>-4</sup> | rs587781246  | Likely pathogenic    |
| #62r       | INF2     | NM_001031714  | c.G2489T          | p.G830V           | 1,57X10 <sup>-5</sup> | 4,81X10 <sup>-4</sup> | 1,72X10 <sup>-4</sup> | rs377340315  | VUS                  |
| #52u       | KBTBD13  | NM_001101362  | c.G1112C          | p.C371S           | 0                     | 0                     | 4,48X10 <sup>-5</sup> | rs1019923438 | VUS                  |
| #56u       | KBTBD13  | NM_001101362  | c.A239T           | p.Q80L            | 0                     | 0                     | 0                     | -            | VUS                  |
| #66u       | KBTBD13  | NM_001101362  | c.C436T           | p.R146C           | 0                     | 0                     | 0                     | -            | VUS                  |
| #69u       | KBTBD13  | NM_001101362  | c.C1232T          | p.T411M           | 3,39X10 <sup>-4</sup> | 0                     | 0                     | rs372826347  | VUS                  |
| #76u       | KBTBD13  | NM_001101362  | c.T1322A          | p.L441Q           | 0                     | 0                     | 9,12X10 <sup>-5</sup> | rs1005611902 | VUS                  |
| #45r       | KCNA2    | NM_004974     | c.T1351C          | p.S451P           | 0                     | 0                     | 0                     | -            | VUS                  |
| #60r       | KIF1B    | NM_015074     | c.A2961C          | p.K987N           | 0                     | 0                     | 0                     | -            | VUS                  |
| #60r       | KIF1B    | NM_015074     | c.G5270A          | p.R1757Q          | 0                     | 0                     | 0                     | rs1010276300 | VUS                  |
| #55u       | KIF1B    | NM_015074     | c.G2942T          | p.R981L           | 0                     | 0                     | 0                     | -            | VUS                  |
| #105u      | KIF1B    | NM_015074     | c.A1210G          | p.S404G           | 0                     | 0                     | 0                     | -            | VUS                  |
| #108u      | KIF1B    | NM_183416     | c.C2707T          | p.R903C           | 0                     | 0                     | 0                     | -            | VUS                  |
| #54u       | LDB3     | NM_001171610  | c.G1801A          | p.V601I           | 0                     | 0                     | 0                     | rs727503130  | VUS                  |
| #55r       | LMNA     | NM_001257374  | c.G1184A          | p.S395N           | 0                     | 0                     | 0                     | -            | Likely pathogenic    |
| #6u        | MORC2    | NM_014941     | c.C1567T          | p.R523C           | 1,77X10 <sup>-5</sup> | 0                     | 4,24X10 <sup>-5</sup> | rs548292999  | VUS                  |
| #72u       | MTMR2    | NM_016156     | c.A408C           | p.E136D           | 0                     | 0                     | 0                     | -            | VUS                  |
| #119u      | MTMR2    | NM_016156     | c.G256C           | p.D86H            | 0                     | 0                     | 0                     | -            | VUS                  |
| #92u       | NDRG1    | NM_006096     | c.C498A           | p.N166K           | 0                     | 0                     | 4,24X10 <sup>-5</sup> | -            | VUS                  |
| #46r       | NPC1     | NM_000271     | c.A2959C          | p.K987Q           | 0                     | 0                     | 0                     | rs969498640  | VUS                  |
| #111u      | PNKP     | NM_007254     | c.T287G           | p.V96G            | 0                     | 0                     | 0                     | -            | VUS                  |
| #60u,#64r  | POLG     | NM_001126131  | c.G2243C          | p.W748S           | 8,43X10 <sup>-4</sup> | 6,20X10 <sup>-4</sup> | 2,97X10 <sup>-4</sup> | rs113994097  | VUS                  |
| #96u       | POLG     | NM_001126131  | c.C1570G          | p.P524A           | 5,77X10 <sup>-5</sup> | 1,55X10 <sup>-4</sup> | 0                     | rs577476988  | VUS                  |
| #113u      | POLG     | NM_001126131  | c.T391C           | p.Y131H           | 4,62X10 <sup>-4</sup> | 7,59X10 <sup>-4</sup> | 3,54X10 <sup>-4</sup> | rs562847013  | VUS                  |
| #69u       | SACS     | NM_014363     | c.C6706T          | p.P2236S          | 0                     | 0                     | 0                     | -            | VUS                  |
| #72u       | SACS     | NM_014363     | c.G6278A          | p.R2093H          | 6,63X10 <sup>-5</sup> | 0                     | 0                     | rs150018812  | VUS                  |
| #122u      | SACS     | NM_014363     | c.T12491C         | p.I4164T          | 0                     | 0                     | 0                     | -            | VUS                  |
| #58r       | SBF1     | NM_002972     | c.G3274A          | p.E1092K          | 1,03X10 <sup>-4</sup> | 0                     | 0                     | rs371576175  | VUS                  |
| #74u       | SBF2     | NM_030962     | c.A2527G          | p.M843V           | 0                     | 0                     | 0                     | rs1228700161 | VUS                  |
| #51u       | SEPT9    | NM_001113491  | c.G1405A          | p.G469S           | 0                     | 0                     | 0                     | rs1039884847 | VUS                  |
| #64u       | SH3TC2   | NM_024577     | c.G1973A          | p.R658H           | 8,26X10 <sup>-5</sup> | 3,14X10 <sup>-4</sup> | 2,55X10 <sup>-4</sup> | rs138040787  | VUS                  |
| #51u       | SPTBN2   | NM_006946     | c.G4396A          | p.V1466M          | 0                     | 1,55X10 <sup>-4</sup> | 0                     | rs763193925  | VUS                  |
| #119u      | SPTBN2   | NM_006946     | c.C944T           | p.S315L           | 0                     | 0                     | 0                     | rs1373892107 | VUS                  |
| #48r       | TPM2     | NM_001301226  | c.C356T           | p.A119V           | 0                     | 0                     | 0                     | rs757873408  | VUS                  |
| #79r       | TRPC3    | NM_001130698  | c.G868A           | p.A290T           | 0                     | 0                     | 4,24X10 <sup>-5</sup> | -            | VUS                  |
| #66r       | TRPV4    | NM_021625     | c.C1390T          | p.R464C           | 4,94X10 <sup>-5</sup> | 0                     | 1,27X10 <sup>-4</sup> | rs373049874  | VUS                  |
| #53r       | WASHC5   | NM_014846     | c.T2644G          | p.F882V           | 0                     | 0                     | 0                     | rs779756399  | VUS                  |
| #59r       | ZFYVE26  | NM_015346     | c.G6062A          | p.R2021H          | 5,77X10 <sup>-5</sup> | 0                     | 8,47X10 <sup>-5</sup> | rs367758946  | VUS                  |

PopMax MAF (ExAc): Maximal general minor allele frequency of the variant in the ExAc database; ACMG: guideline of the American College of Medical Genetics and Genomics; dbSNP: Single Nucleotide Polymorphism Database reference SNP ID number for the variant; ALSdb MAF ALS: Minor allele frequency in ALS Data

Browser (ALSdb) variants from 3,239 ALS cases; ALSdb MAF Control: Minor allele frequency in ALS Data  
Browser (ALSdb) containing variants from 11,808 controls; VUS: variant of uncertain significance;
